# Supplementary material for: Size-exclusion chromatography-based enrichment of extracellular vesicles from urine samples
Source: PubMed Central journal article supplement — J Extracell Vesicles. 2015 May 28;4:10.3402/jev.v4.27369. doi: 10.3402/jev.v4.27369 (PMC4449362; doi:10.3402/jev.v4.27369), 2015-05-28
Supplement: JEV-4-27369-s001.pdf [file JEV-4-27369-s001.pdf]

**Supplementary Data**

**Non-Concentrated urine**

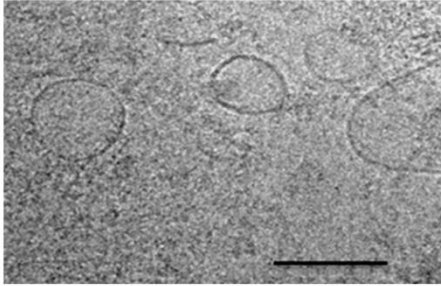

**Concentrated urine**

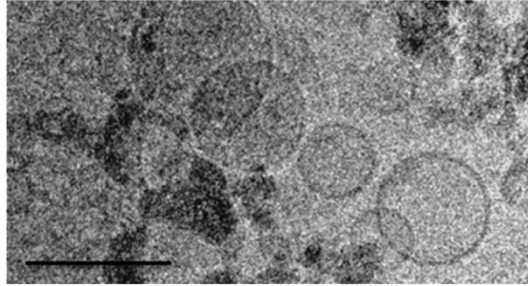

**Supplementary Figure 1**

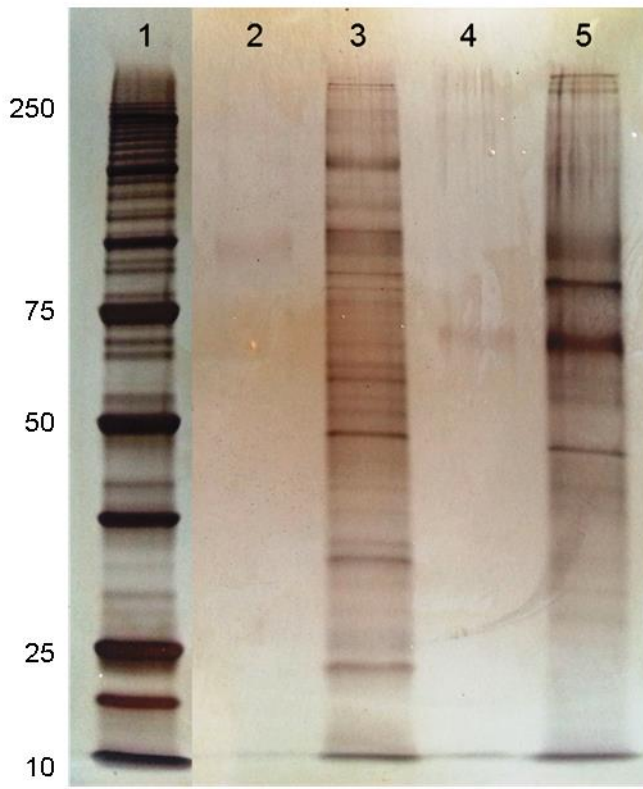

**Supplementary Figure 2**
